# Supplementary material for: Crystallographic interface control of the plasmonic photocatalyst consisting of gold nanoparticles and titanium(iv) oxide
Source: Royal Society of Chemistry journal article supplement (doi:10.1039/d2sc03549a), 2022-01-01
Supplement: d2sc03549a1.pdf [file d2sc03549a1.pdf]

## Electronic supplementary information

# Crystallographic interface control of the plasmonic photocatalyst consisting of gold nanoparticles and titanium(IV) oxide

*Shin-ichi Naya,<sup>a</sup> Atsunobu Akita,<sup>b</sup> Yoko Morita,<sup>b</sup> Musashi Fujishima,<sup>b,c</sup>  
and Hiroaki Tada<sup>\*b,c</sup>*

<sup>a</sup> Environmental Research Laboratory, Kindai University, 3-4-1, Kowakae, Higashi-Osaka, Osaka 577-8502, Japan.

<sup>b</sup> Graduate School of Science and Engineering, Kindai University, 3-4-1, Kowakae, Higashi-Osaka, Osaka 577-8502, Japan.

<sup>c</sup> Department of Applied Chemistry, Faculty of Science and Engineering, Kindai University, 3-4-1, Kowakae, Higashi-Osaka, Osaka 577-8502, Japan.

\* To whom correspondence should be addressed: TEL: +81-6-6721-2332, FAX: +81-6-6727-2024,

E-mail: [h-tada@apch.kindai.ac.jp](mailto:h-tada@apch.kindai.ac.jp).

**Table of contents**

|                               |        |
|-------------------------------|--------|
| 1. Supplementary Figures..... | S3-11  |
| 2. Supplementary Tables.....  | S12-16 |

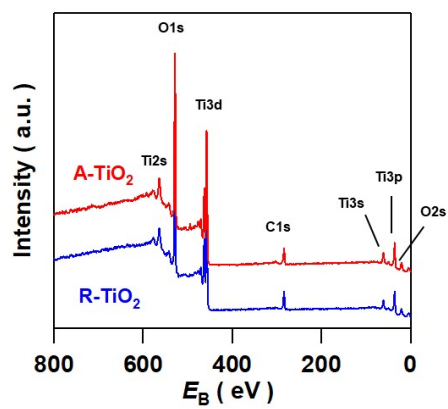

**Fig. S1.** Wide-scan XPS spectra of anatase  $\text{TiO}_2$  (A- $\text{TiO}_2$ ) and rutile  $\text{TiO}_2$  (R- $\text{TiO}_2$ ).

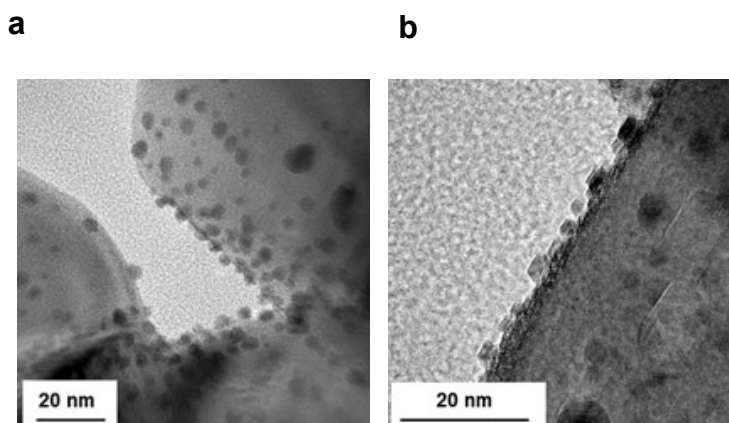

**Fig. S2.** TEM images of Au/A- $\text{TiO}_2$  (a) and Au/R- $\text{TiO}_2$  (b).

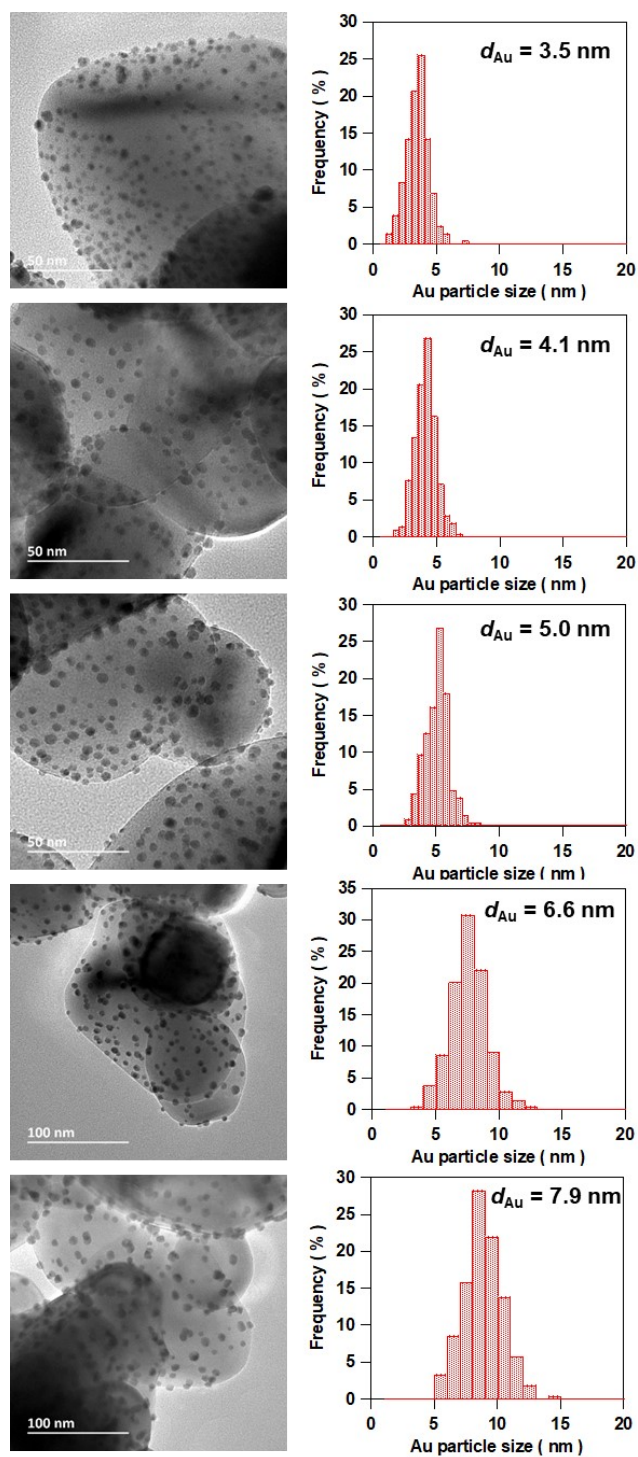

**Fig. S3.** TEM images and Au size distributions of Au/A-TiO<sub>2</sub> prepared by the deposition precipitation under different conditions.

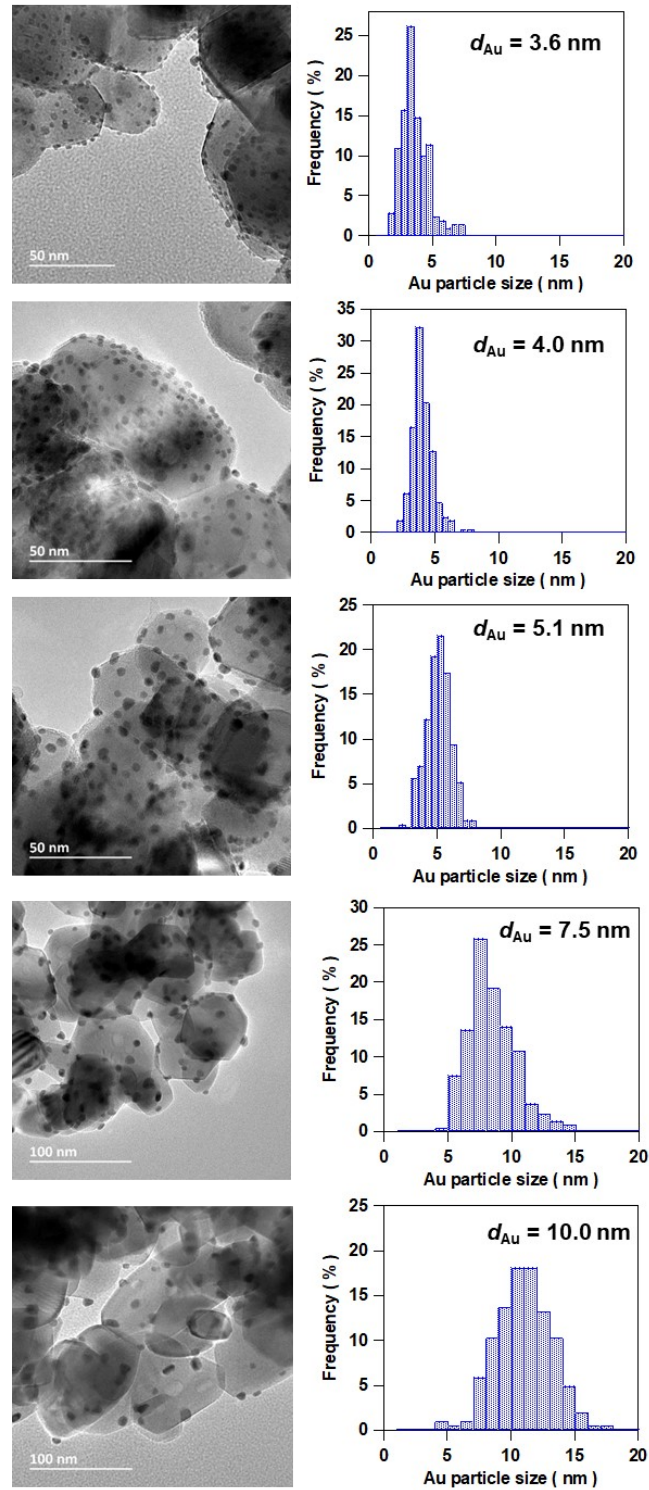

**Fig. S4.** TEM images and Au size distributions of Au/R-TiO<sub>2</sub> prepared by the deposition precipitation under different conditions.

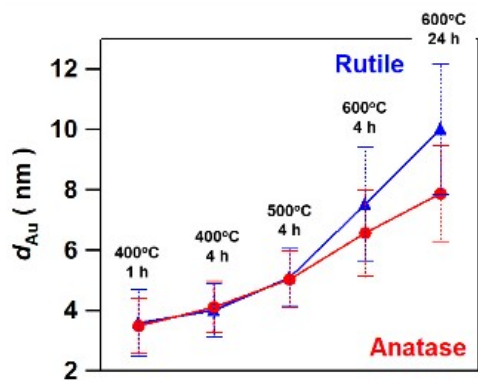

**Fig. S5.** Au particle size control on anatase and rutile  $\text{TiO}_2$  particles. The calcination temperature and time of Au/ $\text{TiO}_2$  are shown above each data point.

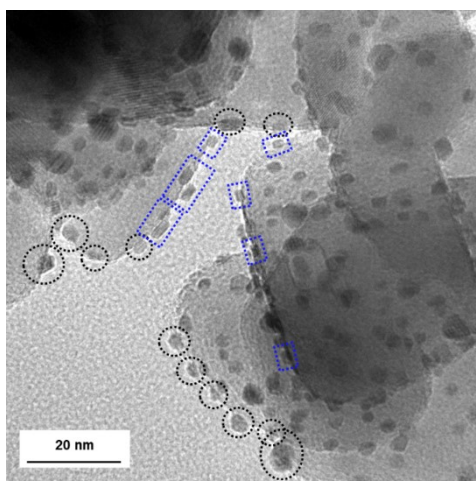

**Fig. S6.** TEM image of Au/R- $\text{TiO}_2$  prepared at  $T_c = 673$  K and  $t_c = 1$  h. Faceted and non-faceted Au NPs are shown by dotted blue rectangle and black circle.

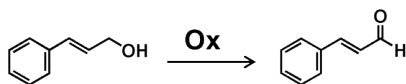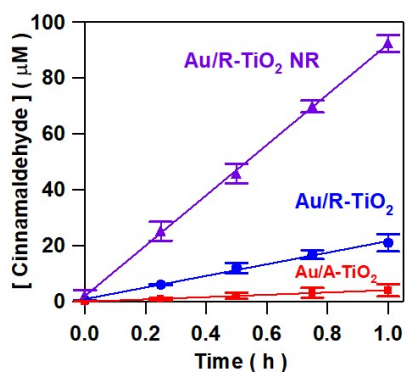

**Fig. S7.** Time courses for cinnamyl alcohol oxidation under visible-light irradiation ( $\lambda_{\text{ex}} > 490$  nm, light intensity integrated from 420 to 485 nm = 3.3 mW cm<sup>-2</sup>) in the presence of Au/A-TiO<sub>2</sub> or Au/R-TiO<sub>2</sub> or Au/R-TiO<sub>2</sub> NR.

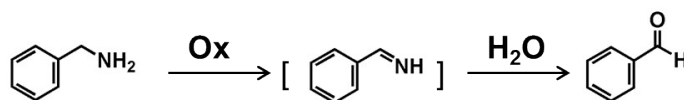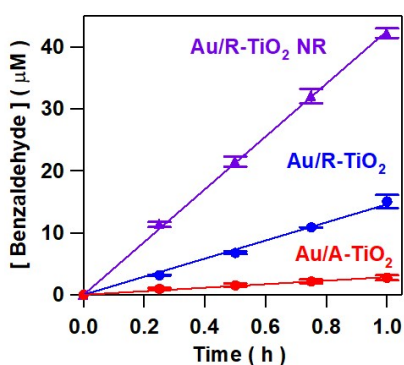

**Fig. S8.** Time courses for benzylamine oxidation under visible-light irradiation ( $\lambda_{\text{ex}} > 430$  nm, light intensity integrated from 420 to 485 nm = 6.0 mW cm<sup>-2</sup>) in the presence of Au/A-TiO<sub>2</sub> or Au/R-TiO<sub>2</sub> or Au/R-TiO<sub>2</sub> NR.

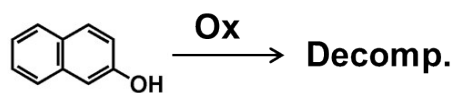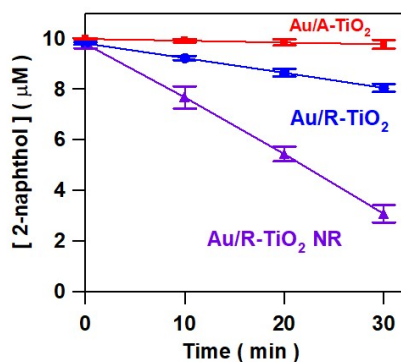

**Fig. S9.** Time courses for 2-naphthol decomposition under visible-light irradiation ( $\lambda_{\text{ex}} > 430$  nm, light intensity integrated from 420 to 485 nm = 6.0 mW cm<sup>-2</sup>) in the presence of Au/A-TiO<sub>2</sub> or Au/R-TiO<sub>2</sub> or Au/R-TiO<sub>2</sub> NR.

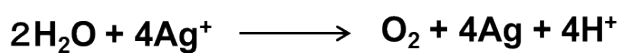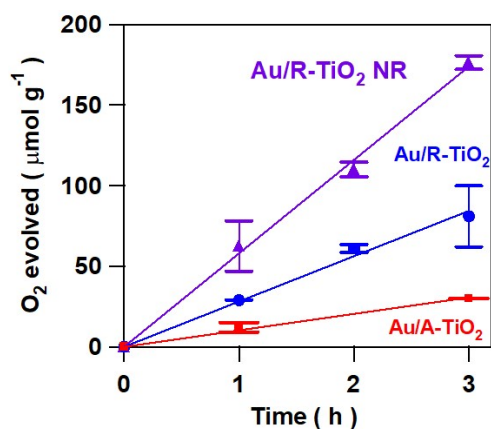

**Fig. S10.** Time courses for O<sub>2</sub> evolution from 10 mM aqueous solution of AgNO<sub>3</sub> (10 mL) containing La<sub>2</sub>O<sub>3</sub> (20 mg) under visible-light irradiation ( $\lambda_{\text{ex}} > 470$  nm, light intensity = 30 mW cm<sup>-2</sup>) in the presence of Au/A-TiO<sub>2</sub> or Au/R-TiO<sub>2</sub> or Au/R-TiO<sub>2</sub> NR (10 mg).



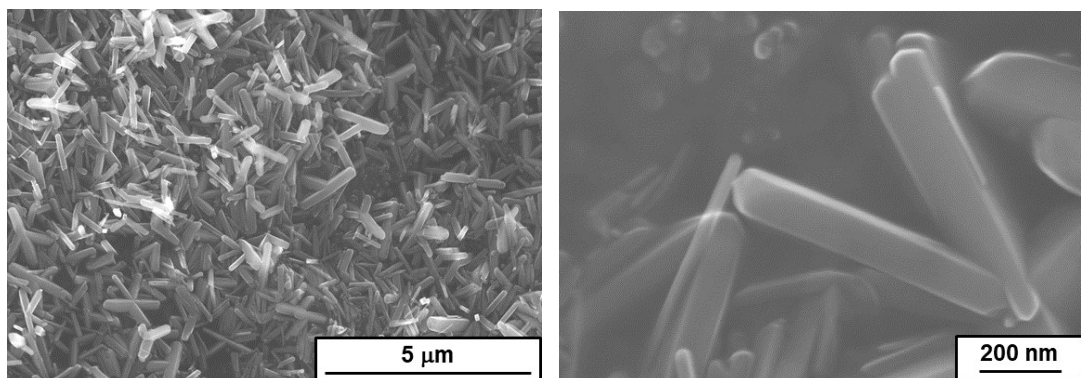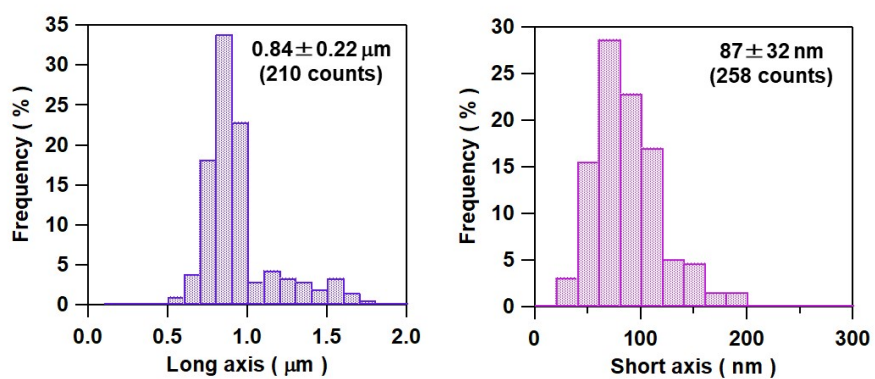

**Fig. S11.** SEM images and distribution of long and short axis length of R-TiO<sub>2</sub> NR.

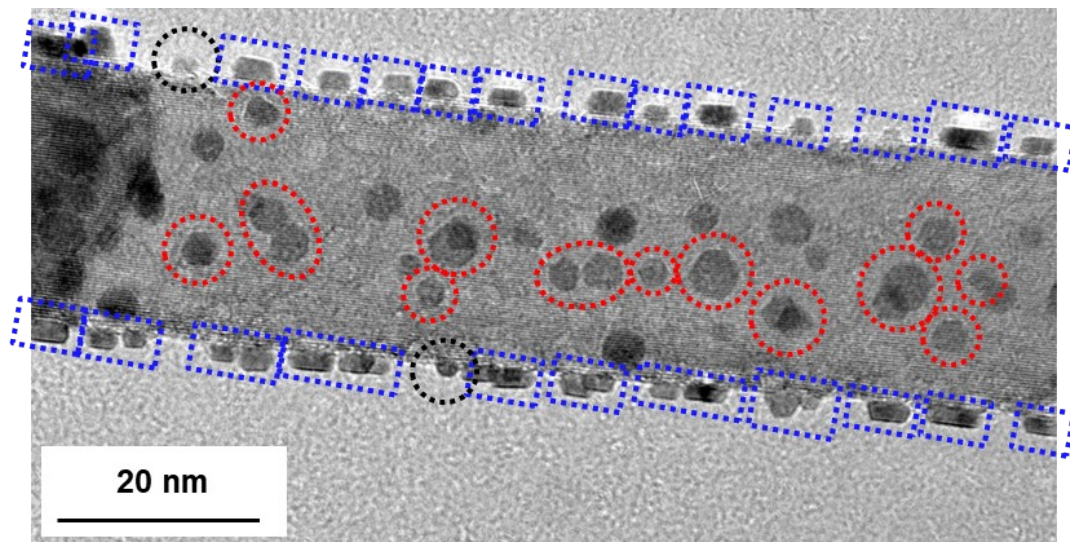

**Fig. S12.** TEM image of Au/R-TiO<sub>2</sub> NR prepared at  $T_c = 673$  K and  $t_c = 1$  h. Faceted and non-faceted Au NPs are shown by dotted blue rectangle and black circle.

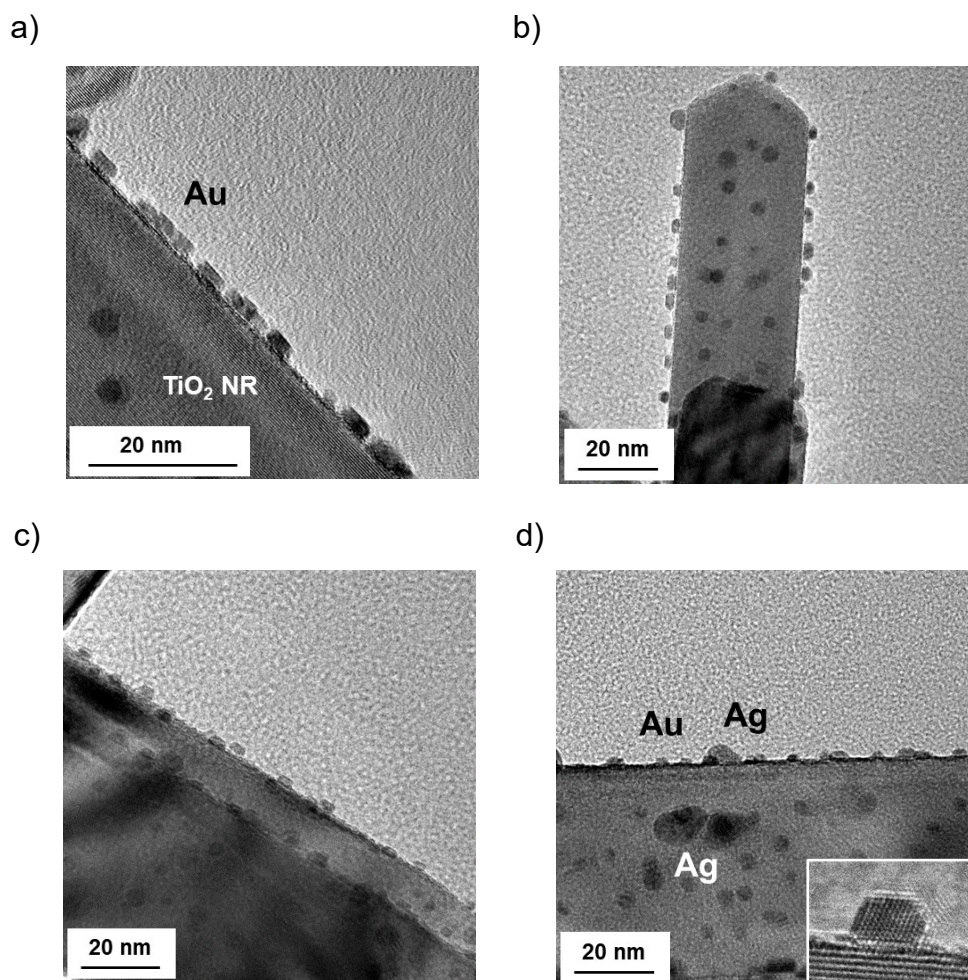

**Fig. S13.** TEM images of Au/R-TiO<sub>2</sub> NR after reactions: (a) the oxidations of cinnamyl alcohol to cinnamaldehyde, (b) benzylamine to benzaldehyde, (c) the oxidative degradation of 2-naphthol, and (d) O<sub>2</sub> evolution from 10 mM aqueous solution of AgNO<sub>3</sub>.

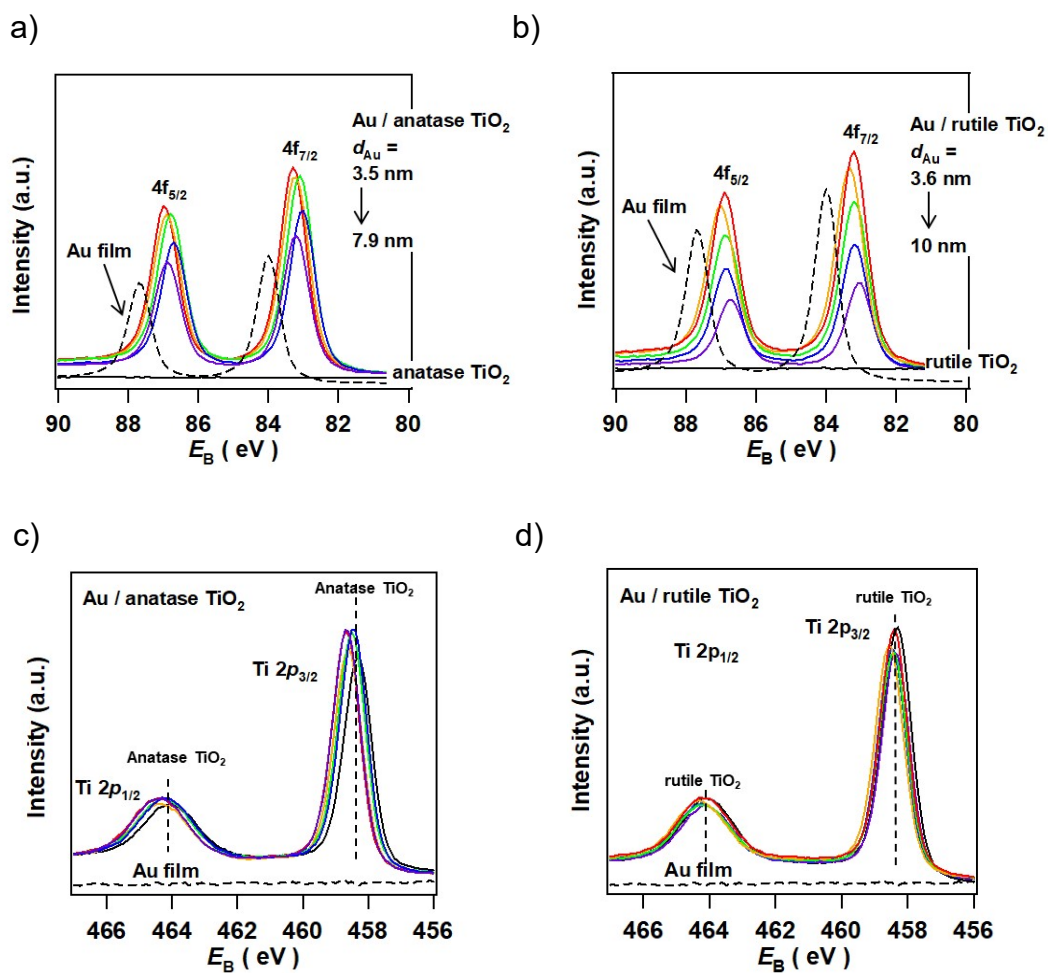

**Fig. S14.** Au 4f-XPS spectra of Au/A-TiO<sub>2</sub> (a) and Au/R-TiO<sub>2</sub> (b) with varying  $d_{Au}$ , and unmodified TiO<sub>2</sub> and Au film-coated glass plate for comparison. Ti 2p-XPS spectra of Au/A-TiO<sub>2</sub> (c) and Au/R-TiO<sub>2</sub> (d) with varying  $d_{Au}$ , and unmodified TiO<sub>2</sub> and Au film-coated glass plate for comparison.

**Table S1.** Crystal-form effect on the plasmonic photocatalytic activity of Au/TiO<sub>2</sub>

| Reaction                   | Reaction rate                |                              | ratio<br>of R/A | Ref. |
|----------------------------|------------------------------|------------------------------|-----------------|------|
|                            | Rutile (R)                   | Anatase (A)                  |                 |      |
| 2-Propanol oxidation       | 0.545 $\mu\text{mol h}^{-1}$ | 0.284 $\mu\text{mol h}^{-1}$ | 1.96            | S1,2 |
| Cinnamyl alcohol oxidation | 6.00 $\mu\text{mol h}^{-1}$  | 1.03 $\mu\text{mol h}^{-1}$  | 5.81            | S3   |
| Benzylamine oxidation      | 1.82 $\mu\text{mol h}^{-1}$  | 0.102 $\mu\text{mol h}^{-1}$ | 17.8            | S4   |
| H <sub>2</sub> evolution   | 18.5 $\mu\text{mol h}^{-1}$  | 0 $\mu\text{mol h}^{-1}$     | ---             | S5   |
| Nitrobenzene reduction     | 7.38 $\mu\text{mol h}^{-1}$  | 1.04 $\mu\text{mol h}^{-1}$  | 7.10            | S6   |
| Oxygen evolution reaction  | 10.1 $\mu\text{mol h}^{-1}$  | 2.24 $\mu\text{mol h}^{-1}$  | 4.52            | S7   |
| Water oxidation            | 4.46 $\mu\text{A cm}^{-2}$   | 0.109 $\mu\text{A cm}^{-2}$  | 40.9            | S8   |
| Nonylphenol degradation    | 2.46 $\mu\text{mol h}^{-1}$  | 0.321 $\mu\text{mol h}^{-1}$ | 7.65            | S9   |
| 2-Naphthol degradation     | 2.40 $\mu\text{mol h}^{-1}$  | 0.238 $\mu\text{mol h}^{-1}$ | 10.1            | S10  |

## Reference

- (S1) E. Kowalska, R. Abe and B. Ohtani, Visible light-induced photocatalytic reaction of gold-modified titanium(IV) oxide particles: action spectrum analysis. *Chem. Commun.*, 2009, **45**, 241-243.
- (S2) E. Kowalska, O. O. P. Mahaney and B. Ohtani, Visible-light-induced photocatalysis through surface plasmon excitation of gold on titania surfaces. *Phys. Chem. Chem. Phys.*, 2010, **12**, 2344-2355.
- (S3) K. Kimura, S. Naya, Y. Jin-nouchi and H. Tada, TiO<sub>2</sub> crystal form-dependence of the Au/TiO<sub>2</sub> plasmon photocatalyst's activity. *J. Phys. Chem. C*, 2012, **116**, 7111-7117.
- (S4) S. Naya, K. Kimura and H. Tada, One-step selective aerobic oxidation of amines to imines by gold nanoparticle-loaded rutile titanium(IV) oxide plasmon photocatalyst. *ACS Catalysis*, 2013, **3**, 10-13.
- (S5) J. B. Priebe, J. Radnik, A. J. J. Lennox, M.-M. Pohl, M. Karnahl, D. Hollmann, K. Grabow, U. Bentrup, H. Junge, M. Beller and A. Bruckner, Solar hydrogen production by plasmonic Au-TiO<sub>2</sub> catalyst: impact of synthesis protocol and TiO<sub>2</sub> phase on charge transfer efficiency and H<sub>2</sub> evolution rates. *ACS Catal.*, 2015, **5**, 2137-2148.
- (S6) S. Naya, T. Niwa, T. Kume and H. Tada, Visible-light-induced electron transport from small to large nanoparticles in bimodal gold nanoparticle-loaded titanium(IV) oxide. *Angew. Chem. Int. Ed.*, 2014, **53**, 7305-7309.
- (S7) S. Wang, Y. Gao, S. Miao, T. Liu, L. Mu, R. Li, F. Fan and C. Li, Positioning the water oxidation reaction sites in plasmonic photocatalysts. *J. Am. Chem. Soc.*, 2017, **139**, 11771-11778.

- (S8) T. Onishi, M. Teranishi, S. Naya, M. Fujishima and H. Tada, Electrocatalytic effect on the photon-to-current conversion efficiency of gold-nanoparticle-loaded titanium(IV) oxide plasmonic electrode for water oxidation. *J. Phys. Chem. C*, 2020, **124**, 6103-6109.
- (S9) S. Naya, T. Nikawa, K. Kimura and H. Tada, Rapid and complete removal of nonylphenol by gold nanoparticle/rutile titanium(IV) oxide plasmon photocatalyst. *ACS Catal.*, 2013, **3**, 903-907.
- (S10) S. Naya and H. Tada, Dependence of the plasmonic activity of Au/TiO<sub>2</sub> for the decomposition of 2-naphthol on the crystal form of TiO<sub>2</sub> and Au particle size. *J. Catal.*, 2018, **364**, 328-333.

**Table S2.** Characterization results of the Au/A-TiO<sub>2</sub> and Au/R-TiO<sub>2</sub> plasmonic photocatalysts.

| Catalysts                | $d_{\text{Au}} / \text{nm}$<br>(counts) | $x_{\text{Au}} / \text{mass}\%$ | Faceting<br>probability / %<br>(counts) | $T_c / \text{K}$ | $t_c / \text{h}$ |
|--------------------------|-----------------------------------------|---------------------------------|-----------------------------------------|------------------|------------------|
| Au/A-TiO <sub>2</sub>    | $3.5 \pm 0.9$ (203)                     | 4.25                            | negligible (1032)                       | 673              | 1                |
| Au/A-TiO <sub>2</sub>    | $4.1 \pm 0.8$ (208)                     | 4.20                            | negligible (1045)                       | 673              | 4                |
| Au/A-TiO <sub>2</sub>    | $5.0 \pm 0.9$ (205)                     | 4.21                            | negligible (1021)                       | 773              | 4                |
| Au/A-TiO <sub>2</sub>    | $6.6 \pm 1.4$ (208)                     | 4.24                            | 0.1 (1032)                              | 873              | 4                |
| Au/A-TiO <sub>2</sub>    | $7.9 \pm 1.6$ (209)                     | 4.21                            | 0.2 (1037)                              | 873              | 24               |
| Au/R-TiO <sub>2</sub>    | $3.6 \pm 1.1$ (210)                     | 4.22                            | 14.1 (1017)                             | 673              | 1                |
| Au/R-TiO <sub>2</sub>    | $4.0 \pm 0.9$ (211)                     | 4.16                            | 3.6 (1013)                              | 673              | 4                |
| Au/R-TiO <sub>2</sub>    | $5.1 \pm 1.0$ (213)                     | 4.21                            | 1.8 (1009)                              | 773              | 4                |
| Au/R-TiO <sub>2</sub>    | $7.5 \pm 1.9$ (213)                     | 4.31                            | 0.9 (1037)                              | 873              | 4                |
| Au/R-TiO <sub>2</sub>    | $10.0 \pm 2.2$ (204)                    | 4.19                            | 0.8 (1019)                              | 873              | 24               |
| Au/R-TiO <sub>2</sub> NR | $3.5 \pm 0.7$ (223)                     | 4.20                            | 94.2 (1029)                             | 673              | 1                |
| Au/R-TiO <sub>2</sub> NR | $6.3 \pm 1.1$ (205)                     | 4.18                            | 88.7 (1034)                             | 873              | 24               |

**Table S3.** Au 4f and Ti 2p-XP binding energies

| Samples               | $d_{\text{Au}} / \text{nm}$ | Au                     |                        | Ti                     |                        |
|-----------------------|-----------------------------|------------------------|------------------------|------------------------|------------------------|
|                       |                             | 4f <sub>7/2</sub> / eV | 4f <sub>5/2</sub> / eV | 2p <sub>3/2</sub> / eV | 2p <sub>1/2</sub> / eV |
| A-TiO <sub>2</sub>    | ---                         | ---                    | ---                    | 458.3                  | 464.0                  |
| Au/A-TiO <sub>2</sub> | 3.5 ± 0.9                   | 83.3                   | 87.0                   | 458.7                  | 464.4                  |
| Au/A-TiO <sub>2</sub> | 4.1 ± 0.8                   | 83.2                   | 86.9                   | 458.6                  | 464.3                  |
| Au/A-TiO <sub>2</sub> | 5.0 ± 0.9                   | 83.1                   | 86.8                   | 458.5                  | 464.3                  |
| Au/A-TiO <sub>2</sub> | 6.6 ± 1.4                   | 83.0                   | 86.7                   | 458.5                  | 464.3                  |
| Au/A-TiO <sub>2</sub> | 7.9 ± 1.6                   | 83.2                   | 86.9                   | 458.7                  | 464.3                  |
| R-TiO <sub>2</sub>    | ---                         | ---                    | ---                    | 458.3                  | 464.2                  |
| Au/R-TiO <sub>2</sub> | 3.6 ± 1.1                   | 83.2                   | 86.9                   | 458.4                  | 464.3                  |
| Au/R-TiO <sub>2</sub> | 4.0 ± 0.9                   | 83.3                   | 87.0                   | 458.6                  | 464.3                  |
| Au/R-TiO <sub>2</sub> | 5.1 ± 1.0                   | 83.2                   | 86.9                   | 458.4                  | 464.3                  |
| Au/R-TiO <sub>2</sub> | 7.5 ± 1.9                   | 83.2                   | 86.9                   | 458.5                  | 464.2                  |
| Au/R-TiO <sub>2</sub> | 10.0 ± 2.2                  | 83.1                   | 86.7                   | 458.4                  | 464.2                  |



**Table S4.** Comparison of the local electric field between HS Au/A-TiO<sub>2</sub> and t-Oh Au/R-TiO<sub>2</sub> systems calculated by the 3D-FDTD method

| Model                      | $d_{\text{Au}} / \text{nm}$ | $\lambda / \text{nm}$ | Monitor plane | Maximum $E / E_0$ | Maximum $ E ^2 /  E_0 ^2$ |
|----------------------------|-----------------------------|-----------------------|---------------|-------------------|---------------------------|
| HS Au/A-TiO <sub>2</sub>   | 3.5                         | 702                   | $xz$          | 49.6              | 2.5E+03                   |
|                            |                             |                       | $xy$          | 59.9              | 3.6E+03                   |
| t-Oh Au/R-TiO <sub>2</sub> | 3.6                         | 675                   | $xz$          | 138               | 1.9E+04                   |
|                            |                             |                       | $xy$          | 382               | 1.5E+05                   |
|                            |                             |                       | $xz$          | 272               | 7.4E+04                   |
|                            |                             | 704                   | $xy$          | 453               | 2.1E+05                   |
|                            |                             |                       | $xz$          | 448               | 2.0E+05                   |
|                            |                             |                       | $xy$          | 448               | 2.0E+05                   |
